# Supplementary material for: Identification of an Immune-Related Prognostic Signature for Glioblastoma by Comprehensive Bioinformatics and Experimental Analyses
Source: MDPI journal article supplement (doi:10.3390/cells11193000), 2022-09-26
Supplement: s1 [file s1]

Supplementary Table S1

|       | Forward (5'-3' sequence) | Reverse (5'-3' sequence) |
|-------|--------------------------|--------------------------|
| GAPDH | GGAGCGAGATCCCTCCAAAAT    | GGCTGTTGTCATACTTCTCATGG  |
| C5AR1 | ATCTTTGCAGTCGTCTTCCTG    | CGGCTACCGCCAAGTTGAG      |
| IL10  | ATGCCCCAAGCTGAGAACCAAGA  | GCTGGGTCAGCTATCCCAGAG    |
| PPP4C | CTGGATCAGATTCGGACAATCG   | CACCGTCTCATTGAAGTGCCA    |
